# Supplementary material for: Changes in Gut Microbiome upon Orchiectomy and Testosterone Administration in AOM/DSS-Induced Colon Cancer Mouse Model
Source: PubMed Central journal article supplement — Cancer Res Treat. 2022 Jul 1;55(1):196–218. doi: 10.4143/crt.2022.080 (PMC9873319; doi:10.4143/crt.2022.080), 2022-07-01
Supplement: crt-2022-080-S3-Fig..pdf [file crt-2022-080-S3-Fig..pdf]

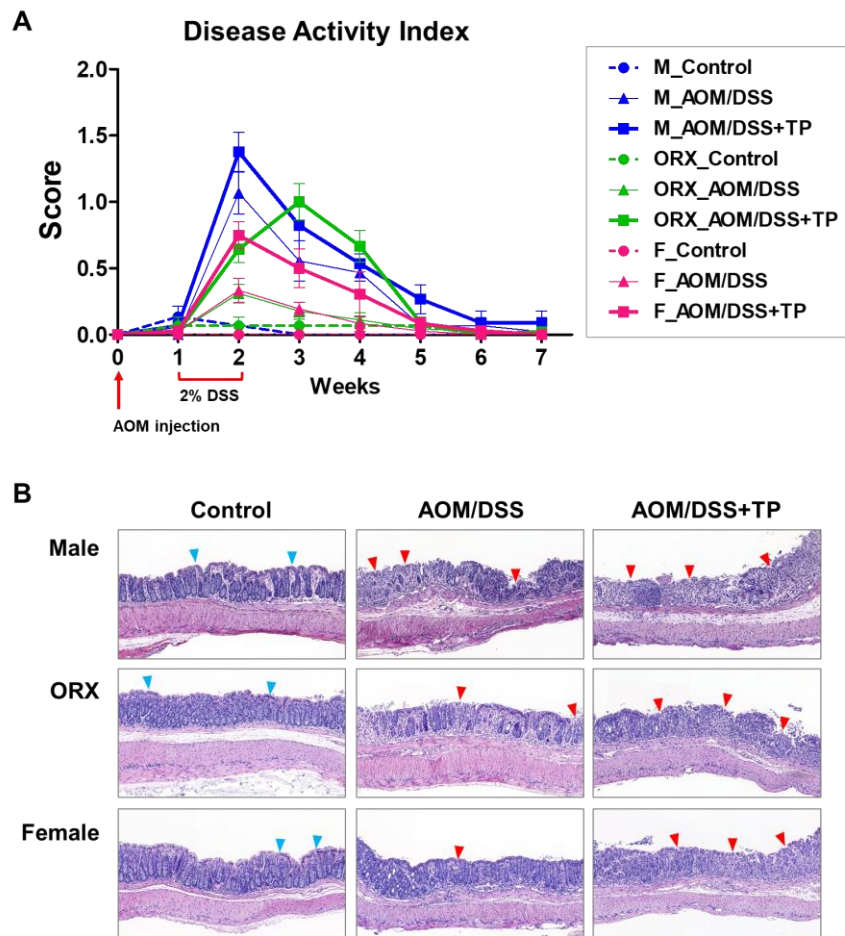

**S3 Fig.** Promoting effects of TP on colitis-associated symptoms in AOM/DSS-induced mouse colitis. (A) DAI score. (B) Representative H&E staining images of colon tissues at week 2 ( $\times 100$ ). The crypt within colon tissues appears normal in control mice (blue arrowhead). However, crypt loss and marked inflammatory cell infiltration can be observed within the colon tissues in all AOM/DSS-treated mice (red arrowhead). Histological damage caused by AOM/DSS is aggravated by TP supplementation (red arrowhead). AOM, azoxymethane; DAI, disease activity index; DSS, dextran sulfate sodium salt; H&E, hematoxylin and eosin; ORX, orchietomized; TP, testosterone propionate. Adapted from Song et al. *Am J Cancer Res.* 2021;11:3145-62, according to Creative Commons license [1].
