# Supplementary material for: Changes in Gut Microbiome upon Orchiectomy and Testosterone Administration in AOM/DSS-Induced Colon Cancer Mouse Model
Source: PubMed Central journal article supplement — Cancer Res Treat. 2022 Jul 1;55(1):196–218. doi: 10.4143/crt.2022.080 (PMC9873319; doi:10.4143/crt.2022.080), 2022-07-01
Supplement: crt-2022-080-S5-Fig..pdf [file crt-2022-080-S5-Fig..pdf]

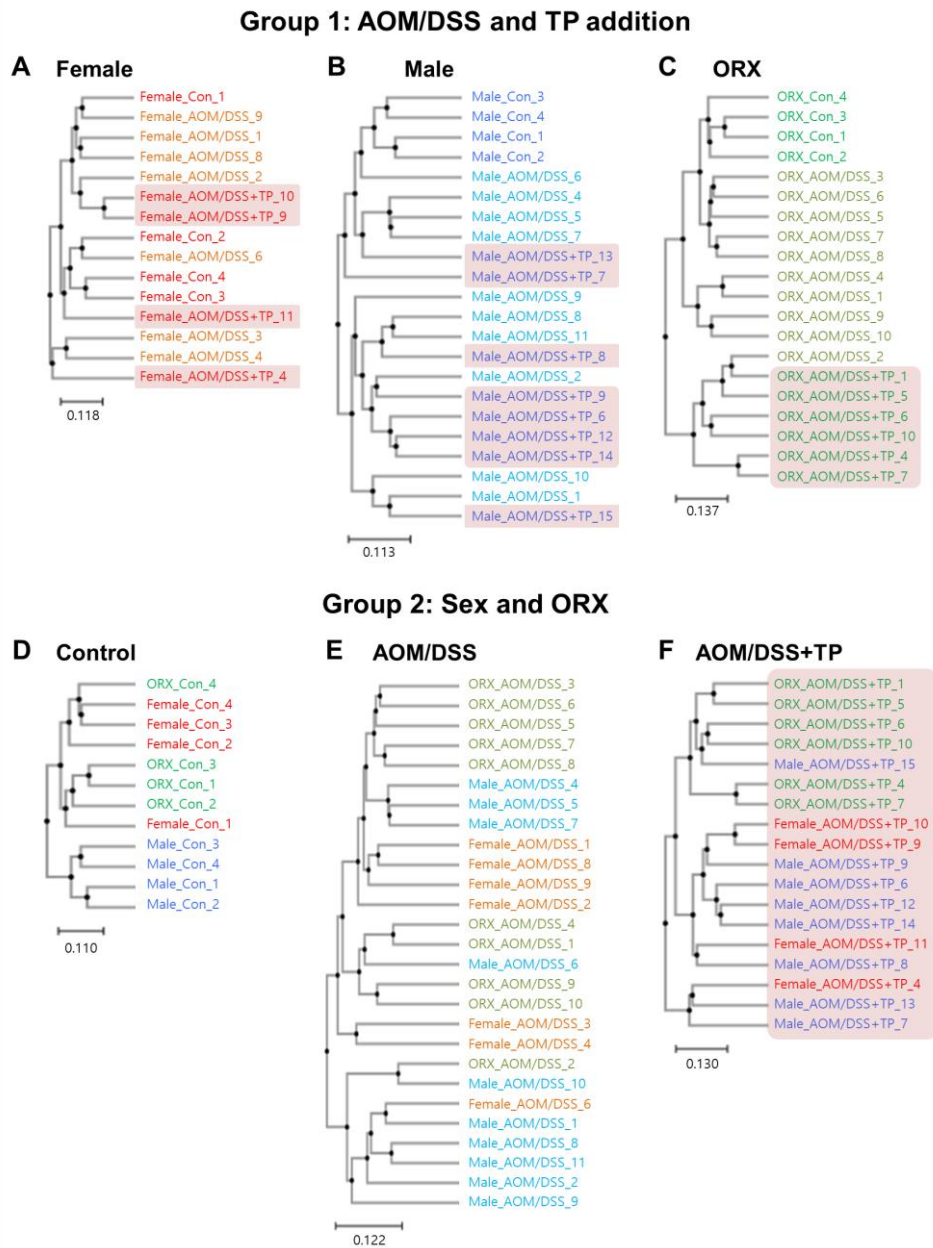

**S5 Fig.** Beta diversity of gut microbiota at the species level. Unweighted pair-group method with arithmetic mean (UPGMA) tree of Generalized Unifrac distances of the stool samples from group 1 (females, males, and ORXs including control, AOM/DSS, and AOM/DSS+TP group) (A-C) and group 2 (control, AOM/DSS, and AOM/DSS+TP groups including female, male, and ORX mice) (D-F). AOM, azoxymethane; CON, control; DSS, dextran sulfate sodium salt; ORX, orchietomized; TP, testosterone propionate.

## Reference

1. Song CH, Kim N, Nam RH, Choi SI, Yu JE, Nho H, et al. Testosterone strongly enhances azoxymethane/dextran sulfate sodium-induced colorectal cancer development in C57BL/6 mice. *Am J Cancer Res.* 2021;11:3145-62.
